# Supplementary material
Source: PubMed Central journal article supplement (PMC3196105)

## SUPPLEMENTAL FIGURE LEGENDS

Supplemental figure 1. **Knock down of syntaxin 6 in endothelial cells does not degrade  $\alpha 1\beta 1$ ,  $\alpha 2\beta 1$ ,  $\alpha v\beta 3$ ,  $\alpha v\beta 5$  and  $\alpha 4\beta 1$  integrins.** Uninfected (Control), si*STX6*- or si*STX16*-expressing HUVECs were cultured on fibronectin-coated surface in complete medium. After 48 h, a fraction of cells was taken out and cell lysates were prepared and western blotting was performed to assess extent of knockdown of syntaxin 6 and syntaxin 16 (A). Rest of the samples were harvested and cultured on collagen- (in B), laminin- (in C), vitronectin- (in D) and fibronectin-coated (in E) surfaces for additional 24 h. Proteins were subjected to SDS-PAGE and immunoblotting was performed with  $\alpha 1$  (MAB1973, Millipore),  $\alpha 2$  (AB1936, Millipore),  $\alpha v$  (611012, BD Biosciences),  $\beta 3$  (4702, Cell Signaling),  $\beta 5$  (3629, Cell Signaling) and  $\alpha 4$  (04-11311, Millipore),  $\beta 1$  and tubulin Abs. A representative blot is shown. (F) Integrin-band densities from “B-E” were quantified; values represent relative levels of  $\alpha$  and  $\beta$  integrins after normalization to arbitrary value of 100 for uninfected (Control). (mean  $\pm$  SD; n=3;  $p \leq 0.003$ ).

Supplemental figure 2. **Inhibition of syntaxin 6 does not affect endothelial cell spreading on collagen (type I), laminin-1 and, vitronectin.** Uninfected (Control), syntaxin 6-cyto- and, syntaxin 16-cyto-expressing HUVECs were cultured on fibronectin-coated surfaces in complete medium. (A) Cells were trypsinized and then allowed to spread on a collagen-, laminin- and, vitronectin-coated glass surface at 37°C for the indicated times. Following fixation, permeabilization and staining with Alexa488-labeled phalloidin, the cells were imaged by epifluorescence microscopy. Representative images are shown. (B) Quantitation of the cell-surface areas of individual cells, based on epifluorescence images of cells described in A. Values represent mean  $\pm$  SD (cells=200, from 3 separate experiments;  $p \leq 0.005$ ). Scale bar represent 5  $\mu$ m.

Supplemental figure 3. **Lysosomal proteases inhibitor treatment does not rescue syntaxin 6-inhibition-induced reduction in FAK phosphorylation, Rac1 activation and, cell spreading on fibronectin.** Uninfected (Control) and syntaxin 6-cyto- or syntaxin 16-cyto-infected HUVECs were grown on fibronectin-coated surfaces for 24 h and were further cultured in the presence of 300  $\mu$ M leupeptin for 12 h. (A) Cells were serum starved for 2–3 h and then stimulated with serum-containing medium for 10 min and stained with Ab against pY397-FAK. Scale bars represent 5  $\mu$ m. (B) Lysates were prepared and subjected to GST-PBD pull-down assay, followed by blotting with Rac1 Ab to detect active Rac1. The relative levels of total Rac1 and tubulin in cell lysates (10% input) were detected by immunoblotting with Abs. (C) The intensity of the band of active Rac1 was assessed after GST-PBD pull down assay and was quantitated and normalized to that of the control. Values represent mean  $\pm$  SD (n=3;  $p \leq 0.005$ ). (D) Cells were trypsinized and then allowed to spread on a fibronectin-coated glass surface at 37°C for the indicated times in complete medium containing leupeptin (300  $\mu$ M). Following fixation, permeabilization and staining with Alexa488-labeled phalloidin, the cells were imaged by epifluorescence microscopy. Representative images are shown. (E) Quantitation of the cell-surface areas of individual cells, based on epifluorescence images of cells described in D. Values represent mean  $\pm$  SD (cells=150, from 3 separate experiments;  $p \leq 0.005$ ). Scale bars represent 5  $\mu$ m.

Supplemental figure 4. **Syntaxin 6 knockdown blocks spreading of endothelial cells on fibronectin.** Uninfected (Control), si*STX6*- or si*STX16*-expressing HUVECs were cultured on fibronectin-coated surface in complete medium for 72 h. Cells were trypsinized and then allowed to spread on a fibronectin-coated glass surface at 37°C for the indicated times. Following fixation, permeabilization and staining with Alexa488-labeled phalloidin, the cells were imaged by epifluorescence microscopy. Representative images are shown. Scale bar represent 5  $\mu$ m.

Supplemental figure 5. **Original linescans generated from images shown in figure 7B.** Epifluorescence images were processed using Metamorph image analysis software and, line was drawn from left edge to

the right edge of the cells as shown in the image using linescan function of the software. Graphs show average pixel intensity changes from left edge of a cell to the right along the line marked on the image shown above.

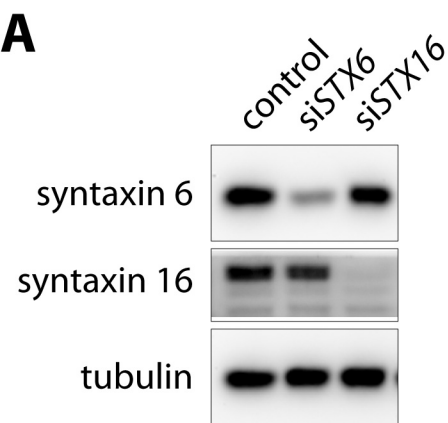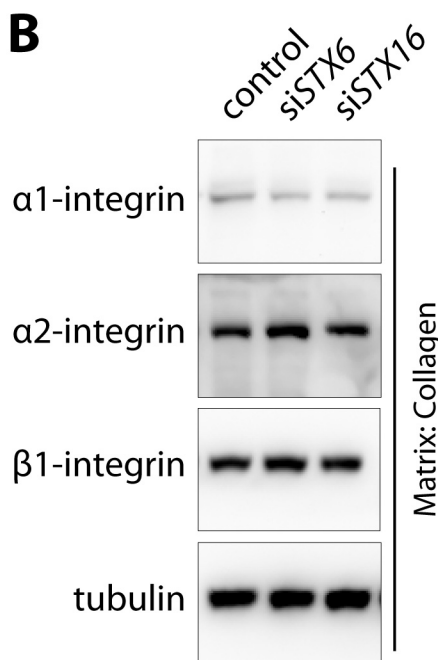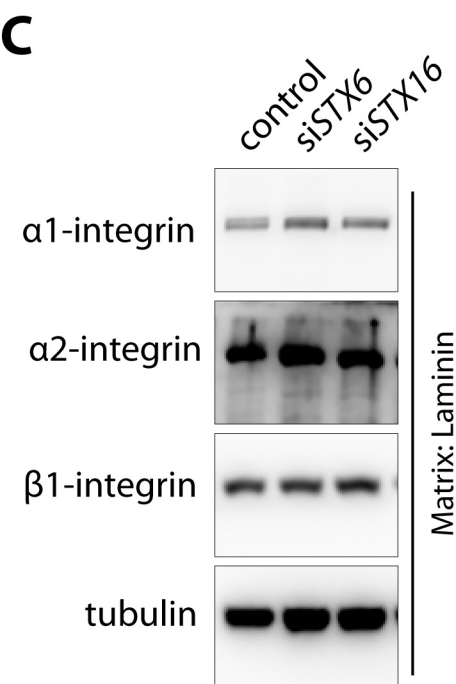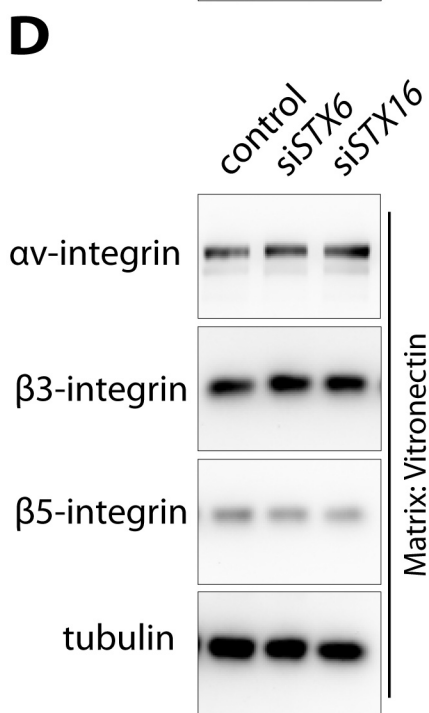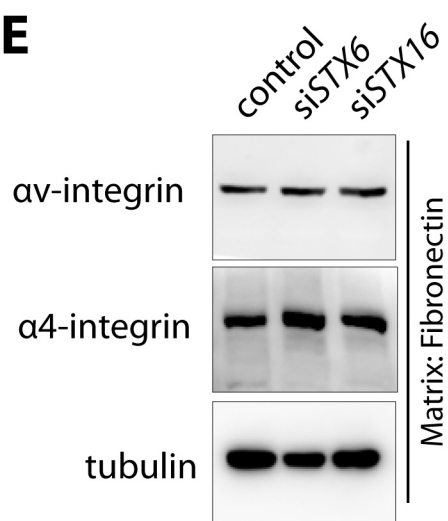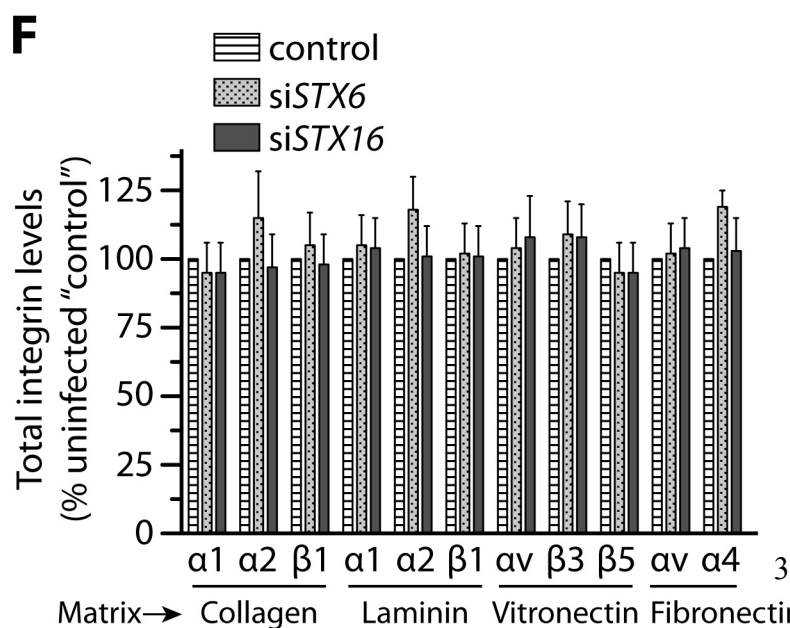

**A**

cell spreading time after seeding

15 min

30 min

45 min

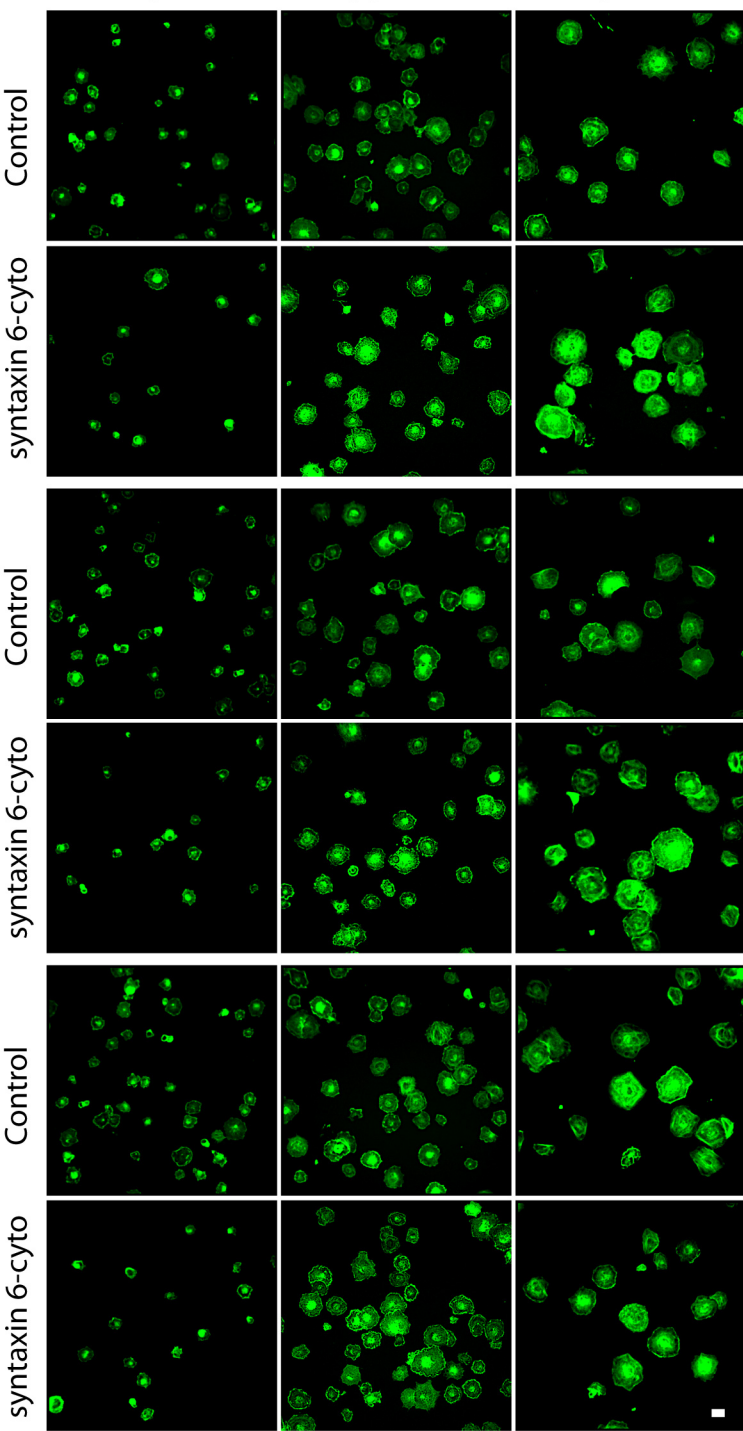**B**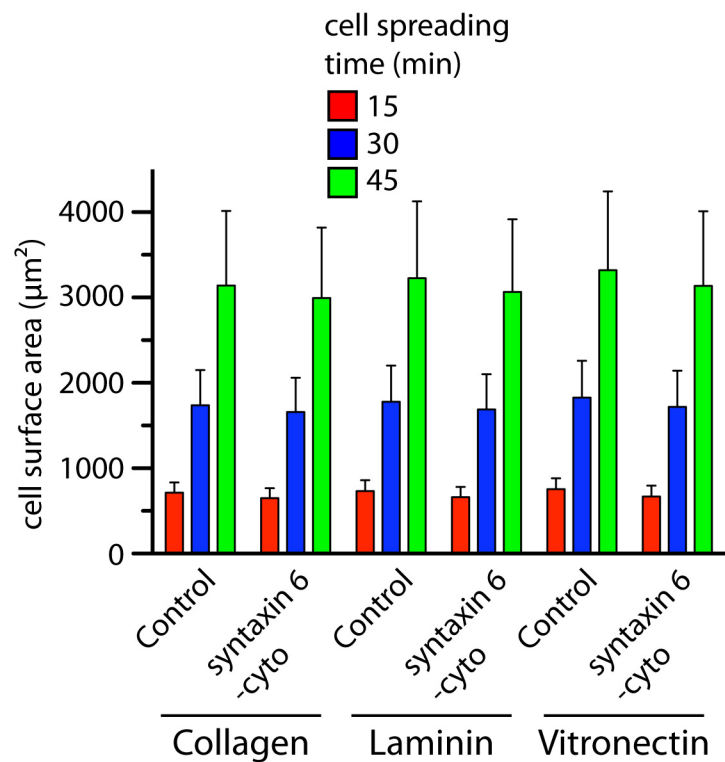

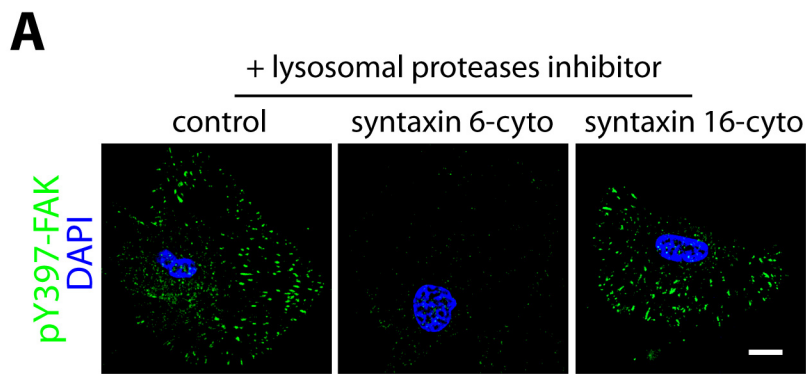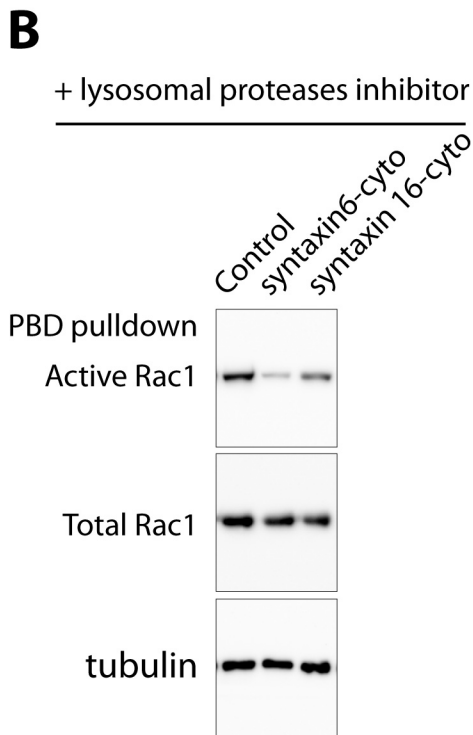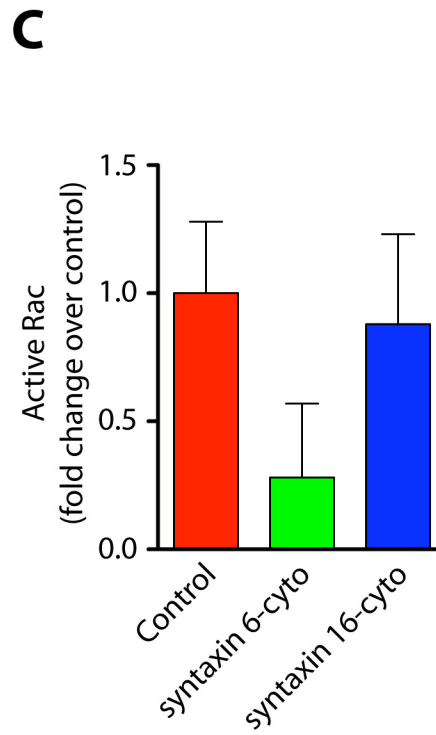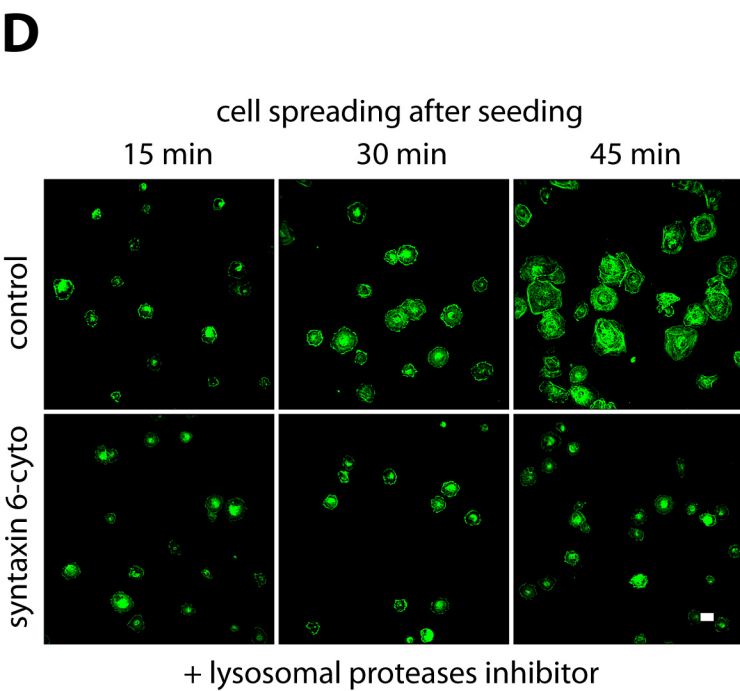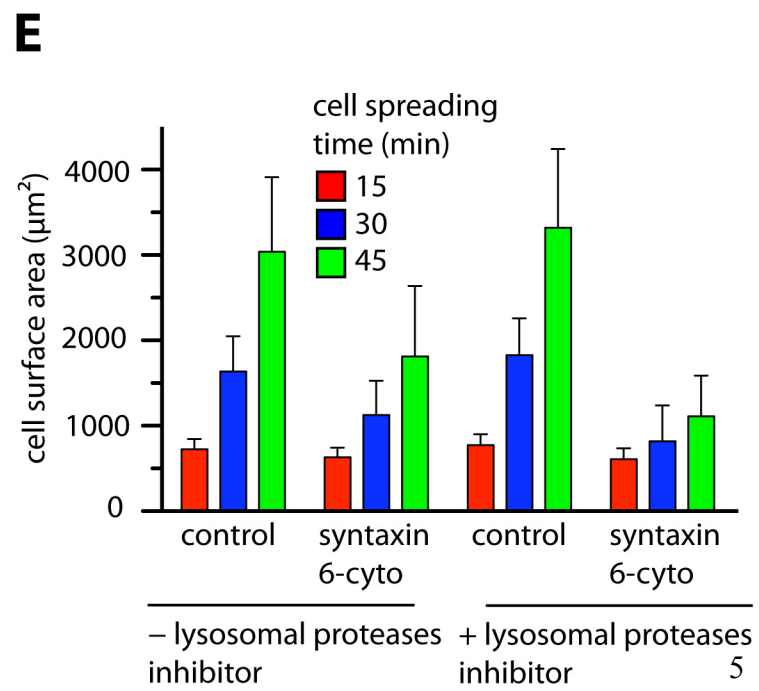

cell spreading time after seeding

15 min

30 min

45 min

Control

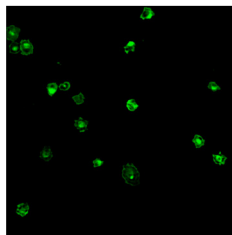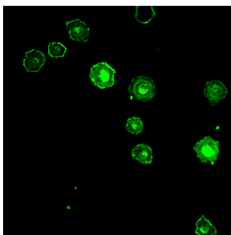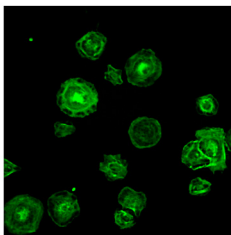

siSTX6

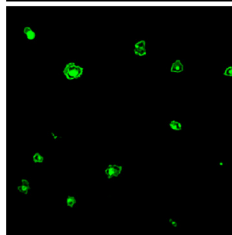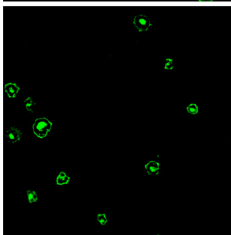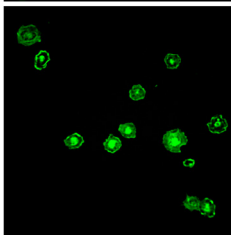

siSTX16

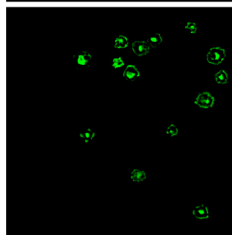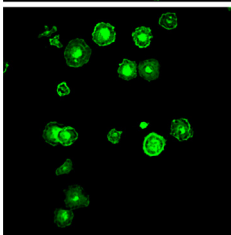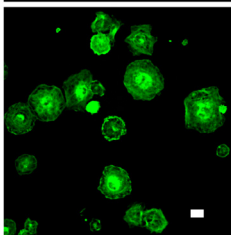

**A**

Control

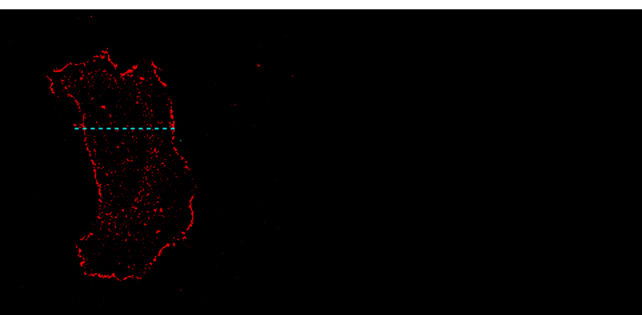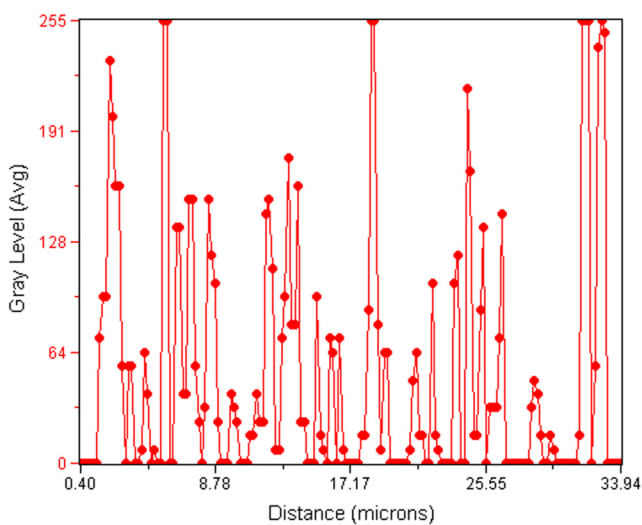**B**

syntaxin 6-cyto

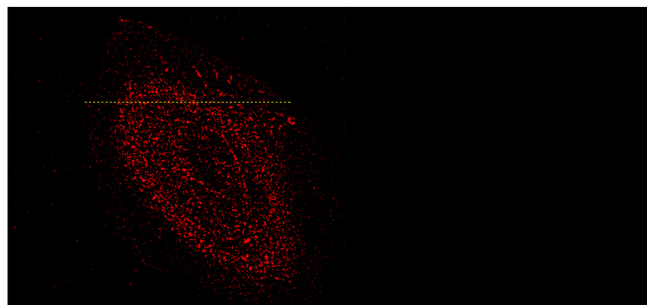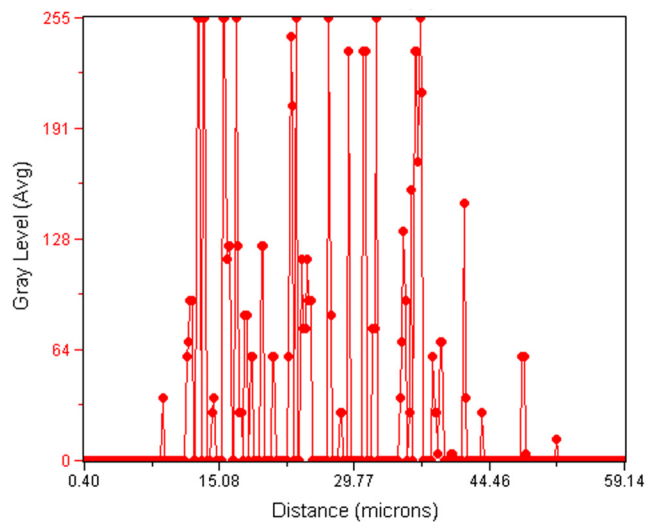**C**

syntaxin 16-cyto

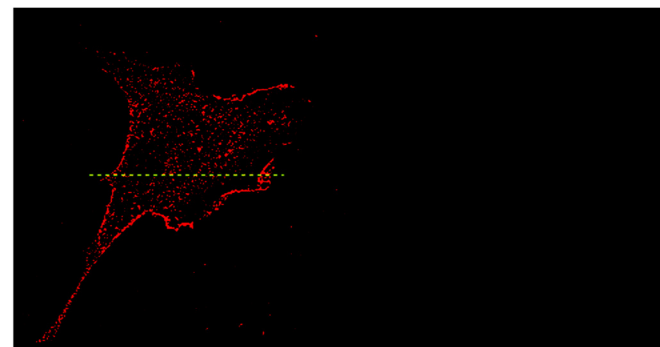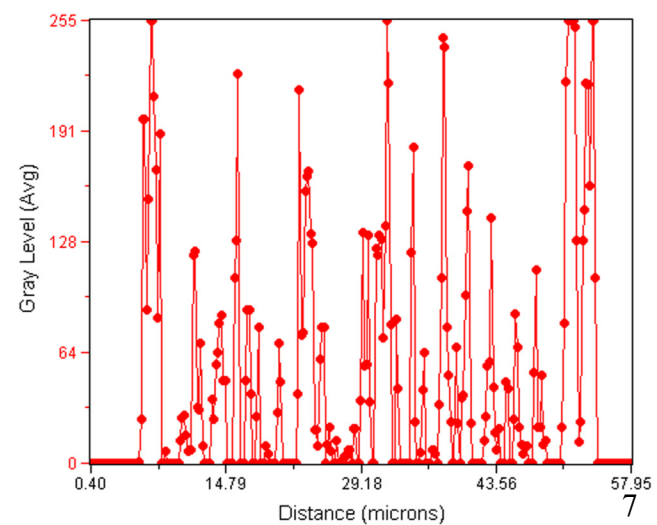

Supplement: supp_M111.260828_jbc.M111.260828-1.pdf [file supp_M111.260828_jbc.M111.260828-1.pdf]
